# Supplementary material for: Magnetic Chitosan for the Removal of Sulfamethoxazole from Tertiary Wastewaters
Source: MDPI journal article supplement (doi:10.3390/nano14050406), 2024-02-23
Supplement: s1 [file s1]

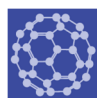

Supplementary materials

# Magnetic Chitosan for the Removal of Sulfamethoxazole from Tertiary Wastewaters

Domenico Pirozzi <sup>1</sup>, Alessandro Latte <sup>1</sup>, Abu Yousuf <sup>2</sup>, Francesco De Mastro <sup>3</sup>, Gennaro Brunetti <sup>3</sup>, Andrea EL Hassanin <sup>1</sup> and Filomena Sannino <sup>4,\*</sup>

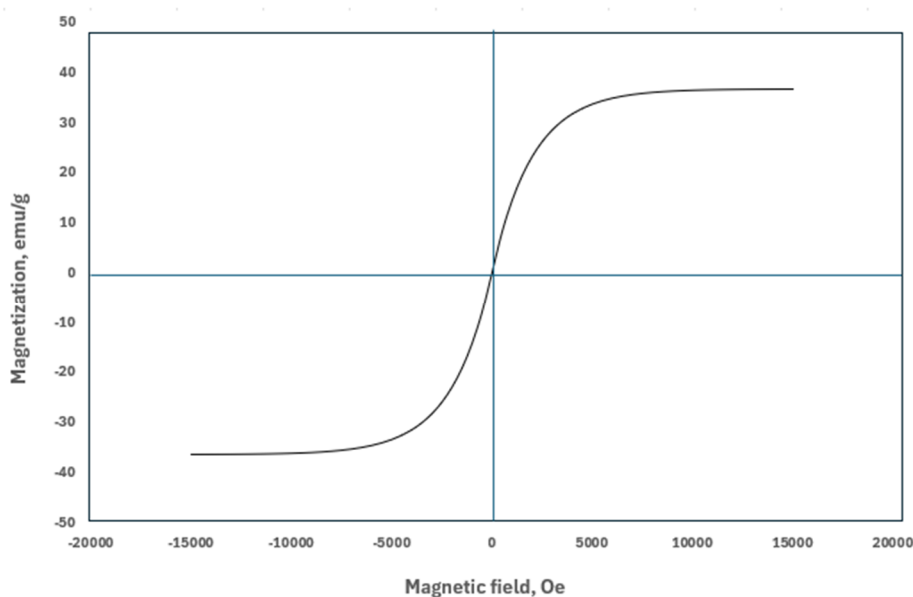

Figure S1. Magnetization curve of the magnetic chitosan.

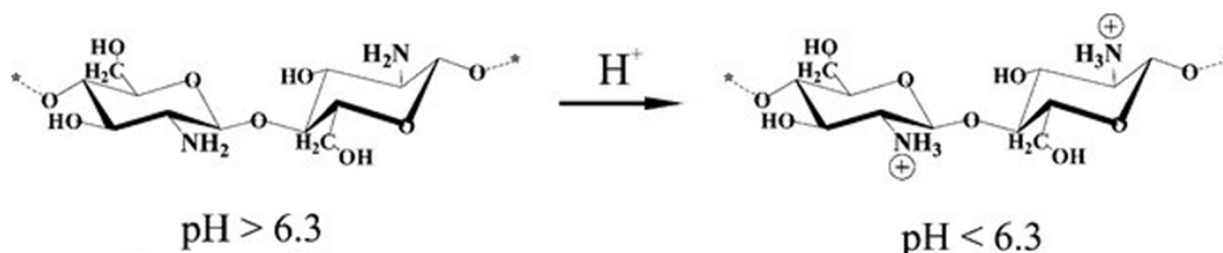

Figure S2. - Structures of chitosan at various pH values in aqueous solution. These structures contain only deacetylated glucosamine residues (from: Shchipunov et al., 2010, Green Chem., 12(7), 1187-1195).

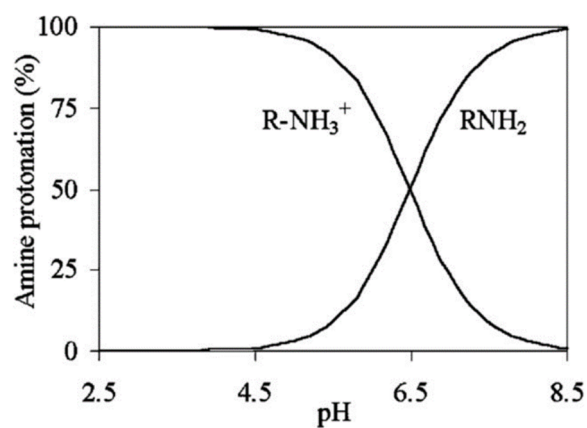

**Figure S3.** - Speciation of amine group as a function of pH (from: Navarro et al., 2019, Macromol. Biosci., 3: 552-561).

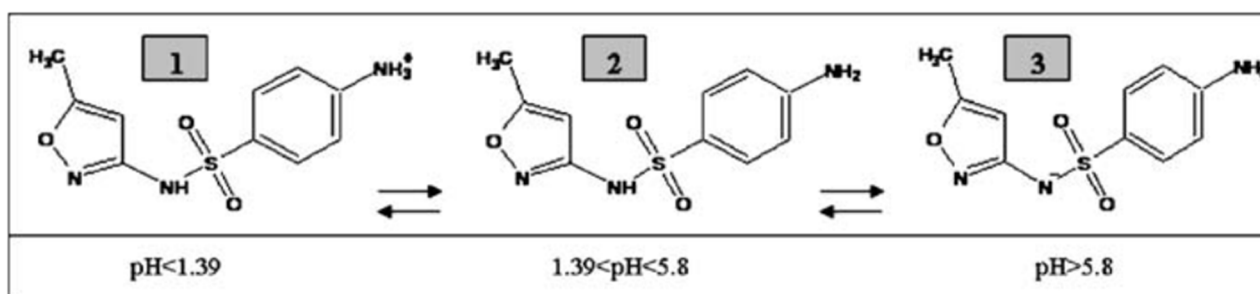

**Figure S4.** - Structures of SMX at various pH values in aqueous solution (from: Avisar et al., 2010, Water Air Soil Pollut., 209, 439-450).

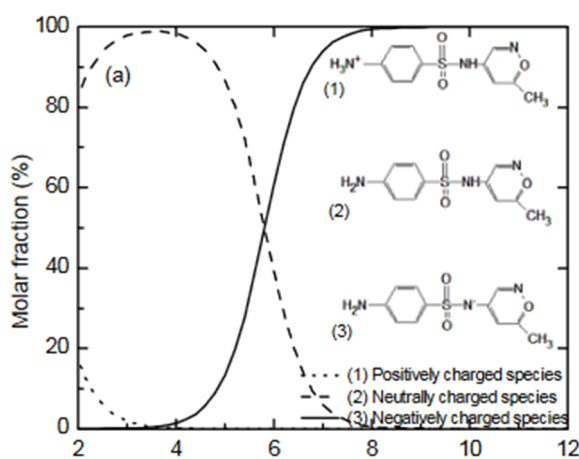

**Figure S5.** - Speciation of SMX as a function of pH (from: Simon et al., 2011, J. Zhejiang Univ. Sci. A **12**, 575-582).

### S1. Kinetic models

Four kinetic models were taken into account describe the adsorption of SMX on magnetic chitosan:

- pseudo-first-order (PFO)

$$\frac{dq_t}{dt} = k_{p1}(q_e - q_t)$$

where  $q_e$  and  $q_t$  are the amount of dye adsorbed ( $\mu\text{mol}\cdot\text{kg}^{-1}$ ) at equilibrium and at time  $t$ , respectively,  $k_{p1}$  is the rate constant of adsorption ( $\text{h}^{-1}$ ) and  $t$  is the time (h). The linear form of the PFO model can be written as:

$$\log(q_e - q_t) = \log q_e - \frac{k_{p1}}{2.303} t$$

- pseudo-second-order (PSO)

$$\frac{dq_t}{dt} = k_{p2}(q_e - q_t)^2$$

where  $k_{p2}$  is the rate constant of adsorption ( $\text{kg } \mu\text{mol}^{-1} \text{ h}^{-1}$ ) and  $t$  is the time (min). The linear form of the PFO model can be written as:

$$\frac{t}{q_t} = \frac{1}{V_0} + \frac{1}{q_e} t$$

where:

$$V_0 = k_{p2} q_e^2$$

- intraparticle diffusion

The linear form of the intraparticle diffusion model can be written as:

$$q_t = K_{diff} \cdot t^{\frac{1}{2}} + c$$

where  $K_{diff}$  is the rate constant of adsorption ( $\mu\text{mol}\cdot\text{kg}^{-1} \text{ h}^{-1/2}$ ) and  $c$  is amount of dye adsorbed ( $\text{mg g}^{-1}$ ) at  $t=0$ .

- Elovich model

$$q_t = \frac{1}{\beta} \ln(1 + \alpha \cdot \beta \cdot t)$$

where  $q_e$  ( $\mu\text{mol}\cdot\text{kg}^{-1}$ ) is the amount of SMX adsorbed per unit mass of adsorbent (adsorption capacity),  $\alpha$  ( $\mu\text{mol}\cdot\text{kg}^{-1}\cdot\text{min}^{-1}$ ) is the Elovich initial adsorption rate,  $\beta$  ( $\text{kg}\cdot\mu\text{mol}^{-1}$ ) is the desorption constant and  $t$  (min) is the time.

The estimates of the parameters and the correlation coefficient are reported in the Table S1.

**Table S1.** - Fitting parameters for the kinetic models for the SMX adsorption on the magnetic chitosan.

|                             | I order                                                                  |                                               |       | II order                                                               |                                                                      |       |
|-----------------------------|--------------------------------------------------------------------------|-----------------------------------------------|-------|------------------------------------------------------------------------|----------------------------------------------------------------------|-------|
|                             | $q_e$<br>( $\mu\text{mol}\cdot\text{kg}^{-1}$ )                          | $K_{p1}$<br>( $\text{h}^{-1}$ )               | $R^2$ | $q_e$<br>( $\mu\text{mol}\cdot\text{kg}^{-1}$ )                        | $K_{p2}$<br>( $\text{kg}\cdot\mu\text{mol}^{-1}\cdot\text{h}^{-1}$ ) | $R^2$ |
| $C_o = 25\ \mu\text{mol/L}$ | $1.81\cdot 10^5$                                                         | 0.101                                         | 0.918 | $1.83\cdot 10^5$                                                       | $1.04\cdot 10^{-6}$                                                  | 0.966 |
| $C_o = 50\ \mu\text{mol/L}$ | $2.81\cdot 10^5$                                                         | 0.020                                         | 0.947 | $2.99\cdot 10^5$                                                       | $7.4\cdot 10^{-8}$                                                   | 0.980 |
|                             | Intraparticle diffusion                                                  |                                               |       | Elovich                                                                |                                                                      |       |
|                             | $K_{diff}$<br>( $\mu\text{mol}\cdot\text{kg}^{-1}\cdot\text{h}^{-1/2}$ ) | $c$<br>( $\mu\text{mol}\cdot\text{kg}^{-1}$ ) | $R^2$ | $\alpha$<br>( $\mu\text{mol}\cdot\text{kg}^{-1}\cdot\text{min}^{-1}$ ) | $\beta$<br>( $\text{kg}\cdot\mu\text{mol}^{-1}$ )                    | $R^2$ |
| $C_o = 25\ \mu\text{mol/L}$ | $3.77\cdot 10^3$                                                         | $1.01\cdot 10^5$                              | 0.978 | $2.51\cdot 10^7$                                                       | $2.30\cdot 10^4$                                                     | 0.990 |
| $C_o = 50\ \mu\text{mol/L}$ | $6.70\cdot 10^3$                                                         | $9.21\cdot 10^4$                              | 0.985 | $7.08\cdot 10^{-5}$                                                    | $2.28\cdot 10^{-5}$                                                  | 0.992 |

## S2. Isotherm models

Two models were taken into account describe the adsorption isotherms of SMX on magnetic chitosan:

- Freundlich model

$$q_e = K_F \cdot C_e^{1/n}$$

where  $q_e$  ( $\mu\text{mol}\cdot\text{kg}^{-1}$ ) is the amount of SMX adsorbed per unit mass of adsorbent (adsorption capacity),  $C_e$  ( $\mu\text{mol}\cdot\text{L}^{-1}$ ) is the equilibrium concentration of SMX in the solution,  $K_F$  ( $\mu\text{mol}^{(n-1)/n}\cdot\text{kg}^{-1}\cdot\text{L}^{1/n}$ ) is the Freundlich constant and  $1/n$  is the heterogeneity factor representing the nonlinearity of the isotherm.

- Langmuir model

$$q_e = q_\infty \frac{KC_{A,e}}{1 + KC_{A,e}}$$

where  $q_e$  is the adsorption density at equilibrium ( $\mu\text{mol}\cdot\text{kg}^{-1}$ ),  $q_\infty$  is the adsorption capacity of the adsorbent or the maximum achievable adsorption density ( $\mu\text{mol}\cdot\text{kg}^{-1}$ ),  $C_{A,e}$  is the equilibrium adsorbate concentration in the liquid phase ( $\text{kg}/\text{m}^3$ ), and  $K$  is the Langmuir equilibrium constant ( $\text{m}^3/\text{kg}$ ).

The estimates of the parameters and the correlation coefficient are reported in the Table S2.

**Table S2.** - Fitting parameters for the isotherm models for the SMX adsorption on the magnetic chitosan.

| Freundlich                                                                   |            |        | Langmuir                                        |                                   |       |
|------------------------------------------------------------------------------|------------|--------|-------------------------------------------------|-----------------------------------|-------|
| $K_f$<br>( $\mu\text{mol}^{(n-1)/n}\cdot\text{kg}^{-1}\cdot\text{L}^{1/n}$ ) | $n$<br>(-) | $R^2$  | $q_e$<br>( $\mu\text{mol}\cdot\text{kg}^{-1}$ ) | $K$<br>( $\text{m}^3/\text{kg}$ ) | $R^2$ |
| $5.98\cdot 10^4$                                                             | 1.96       | 0.9978 | $1.07\cdot 10^6$                                | $1.64\cdot 10^{-2}$               | 0.983 |
